# Supplementary material
Source: PubMed Central journal article supplement (PMC3189485)
Supplement: NIHMS124009-supplement-01.pdf [file NIHMS124009-supplement-01.pdf]

**Supplemental Table 1. Number of organ systems failing by treatment group, by percentages and 95% CI are provided in the table.**

| Organ System Failure      | Treatment Group  |                  | Total<br>n=173   | $\chi^2$ (1) | p-value |
|---------------------------|------------------|------------------|------------------|--------------|---------|
|                           | Placebo<br>n=92  | NAC<br>n=81      |                  |              |         |
| Cardiovascular            | 15%<br>7% - 23%  | 9%<br>2% - 15%   | 12%<br>7% - 17%  | 1.746        | 0.186   |
| Renal                     | 25%<br>16% - 34% | 33%<br>22% - 44% | 29%<br>22% - 36% | 1.456        | 0.228   |
| Intracranial hypertension | 16%<br>8% - 24%  | 9%<br>2% - 15%   | 13%<br>7% - 18%  | 2.278        | 0.131   |
| Pulmonary                 | 59%<br>48% - 69% | 49%<br>38% - 61% | 54%<br>47% - 62% | 1.506        | 0.220   |
| Infection                 | 22%<br>13% - 31% | 35%<br>24% - 46% | 28%<br>21% - 35% | 3.536        | 0.060   |
| Max coma grade $\geq 3$   | 59%<br>48% - 69% | 54%<br>43% - 66% | 57%<br>49% - 64% | 0.336        | 0.562   |

| Total Number of<br>Organ Systems Failed<br>(0-6) | Treatment Group  |                  | Total<br>n=173   | $\chi^2$ (6) | p-value |
|--------------------------------------------------|------------------|------------------|------------------|--------------|---------|
|                                                  | Placebo<br>n=92  | NAC<br>n=81      |                  |              |         |
| 0                                                | 23%<br>14% - 32% | 27%<br>17% - 37% | 25%<br>18% - 32% | 1.964        | 0.923   |
| 1                                                | 17%<br>9% - 26%  | 15%<br>6% - 23%  | 16%<br>10% - 22% |              |         |
| 2                                                | 20%<br>11% - 28% | 22%<br>13% - 32% | 21%<br>14% - 27% |              |         |
| 3                                                | 25%<br>16% - 34% | 19%<br>9% - 28%  | 22%<br>16% - 28% |              |         |
| 4                                                | 13%<br>6% - 20%  | 14%<br>6% - 22%  | 13%<br>8% - 19%  |              |         |
| 5                                                | 1%<br>0% - 4%    | 2%<br>0% - 6%    | 2%<br>0% - 4%    |              |         |
| 6                                                | 1%<br>0% - 4%    | 1%<br>0% - 4%    | 1%<br>0% - 3%    |              |         |

**No differences were observed between the treatment groups in any of these parameters.**
