# Supplementary material
Source: PubMed Central journal article supplement (PMC3189485)
Supplement: NIHMS124009-supplement-02.pdf [file NIHMS124009-supplement-02.pdf]

**Supplemental Table 2. Summary of adverse events by treatment group (percentages and 95% CI).**

| Adverse Events<br>(AEs) Categories | Treatment Group        |                    | Total<br>95% CI  | p-value |
|------------------------------------|------------------------|--------------------|------------------|---------|
|                                    | Placebo n=92<br>95% CI | NAC n=81<br>95% CI |                  |         |
| Any Infection                      | 20%<br>11% - 28%       | 20%<br>10% - 29%   | 20%<br>13% - 26% | 0.975   |
| Any Rash                           | 2%<br>0% - 6%          | 2%<br>0% - 6%      | 2%<br>0% - 5%    | >0.999* |
| Any Bronchospasm                   | 1%<br>0% - 4%          | 1%<br>0% - 4%      | 1%<br>0% - 3%    | >0.999* |
| Any Arrhythmia                     | 10%<br>3% - 16%        | 9%<br>2% - 15%     | 9%<br>5% - 14%   | 0.796   |
| Nausea/Vomiting                    | 4%<br>0% - 9%          | 14%<br>6% - 22%    | 9%<br>4% - 13%   | 0.031   |
| Any Other                          | 9%<br>2% - 15%         | 11%<br>4% - 19%    | 10%<br>5% - 15%  | 0.594   |

| Number of AE Categories<br>for each patient (0-6) | Treatment Group        |                    | Total<br>95% CI    | p-value |
|---------------------------------------------------|------------------------|--------------------|--------------------|---------|
|                                                   | Placebo n=92<br>95% CI | NAC n=81<br>95% CI |                    |         |
| 0                                                 | 59%<br>48% - 69%       | 58%<br>47% - 69%   | 58.4%<br>51% - 66% | 0.122   |
| 1                                                 | 38%<br>28% - 49%       | 30%<br>19% - 40%   | 34%<br>27% - 41%   |         |
| 2                                                 | 2%<br>0% - 6%          | 10%<br>3% - 17%    | 6%<br>2% - 10%     |         |
|                                                   | 1%<br>0% - 4%          | 2%<br>0% - 6%      | 2%<br>0% - 4%      |         |
| 3                                                 |                        |                    |                    |         |

\*Fisher's Exact Test

**No differences were observed between the groups, with the exception of nausea and vomiting which was more common in the treated group.**
